# Supplementary material for: App-Based Intervention Combining Evidence-Based Behavior Change Techniques With a Model-Based Reasoning System to Promote Physical Activity Among Young Adults (Active2Gether): Descriptive Study of the Development and Content
Source: PubMed Central journal article supplement (PMC6320419; doi:10.2196/resprot.7169), 2018-12-21
Supplement: resprot_v7i12e185_app1.pdf [file resprot_v7i12e185_app1.pdf]

## Multimedia Appendix 1

Overview of the behavior change techniques (BCTs) that were selected to target the behavioral determinants of the theoretical framework and how they were applied within the intervention

| <b>Determinant</b>          | <b>BCTs</b>                                                        | <b>Methods</b>   | <b>Parameters for use</b>                                                                                                                              | <b>How applied</b>                                                                                             | <b>Theory BCT</b>                              | <b>Ref</b> |
|-----------------------------|--------------------------------------------------------------------|------------------|--------------------------------------------------------------------------------------------------------------------------------------------------------|----------------------------------------------------------------------------------------------------------------|------------------------------------------------|------------|
| <b>Outcome expectations</b> | Provide general information on consequences of behavior in general | Belief selection | Requires investigation of the current attitudinal, normative and efficacy beliefs of the individual before choosing the beliefs on which to intervene. | Messages in general and tailored to aspects of the intake questionnaire                                        | Information-motivation-behavioral skills model | [1, 2]     |
| <b>Self-efficacy</b>        | Action planning/<br>time management                                | Guided practice  | Subskill demonstration, instruction and enactment with individual feedback                                                                             | Messages prompting the planning of physical activity, e.g. the suggestion to mark time and day in the calendar | Goal setting theory                            | [2-5]      |
|                             | Social comparison                                                  | Modeling         | Attention, remembrance, skills, reinforcement; credible                                                                                                | Graph tailored to preference social comparison (up-/                                                           | Social comparison                              | [2, 3]     |

|                                 |                                                 |                                                                                                                                                                                                                       |                            |                                                                                     |                                                                          |           |
|---------------------------------|-------------------------------------------------|-----------------------------------------------------------------------------------------------------------------------------------------------------------------------------------------------------------------------|----------------------------|-------------------------------------------------------------------------------------|--------------------------------------------------------------------------|-----------|
|                                 |                                                 |                                                                                                                                                                                                                       | source, method and channel | downward                                                                            | theory                                                                   |           |
| Persuasion /<br>Problem solving | Verbal persuasion                               | Credible source.                                                                                                                                                                                                      |                            | Persuasive messages<br>on how to overcome<br>barriers                               | Social<br>cognitive<br>theory                                            | [2, 3]    |
| Prompt self-<br>monitoring      | Self-monitoring of<br>behavior                  | The monitoring must be of the<br>specific behavior (that is, not<br>of a physiological state or<br>health outcome). The data<br>must be interpreted and used.<br>The reward must be<br>reinforcing to the individual. |                            | Messages that<br>prompt to look at the<br>monitoring graphs<br>and display of graph | Self-<br>regulation,<br>Social<br>cognitive<br>theory,<br>Control theory | [2, 4, 6] |
| Plan social support             | Mobilizing social<br>networks                   | Presence of a network that can<br>potentially support health<br>behavior                                                                                                                                              |                            | Messages with<br>suggestions to tell<br>friends and ask for<br>support              | Social support<br>theories                                               | [2-4]     |
| Imaginary reward                | Provide contingent<br>rewards/<br>reinforcement | The reward needs to be<br>tailored to the individual, to<br>follow the behavior in time,<br>and to be seen as a                                                                                                       |                            | Messages that tell the<br>user to be proud if<br>they did well                      | Self-<br>regulation,<br>Social<br>cognitive                              | [2, 6]    |

|                   |                                                                      |          |                                                                                    |                                                                                                                                               |                                                     |        |
|-------------------|----------------------------------------------------------------------|----------|------------------------------------------------------------------------------------|-----------------------------------------------------------------------------------------------------------------------------------------------|-----------------------------------------------------|--------|
|                   |                                                                      |          | consequence of the behavior.                                                       |                                                                                                                                               | theory,;<br>Learning<br>theories                    |        |
| <b>Intentions</b> | Progress towards goal/ Discrepancy between current behavior and goal | Feedback | Feedback needs to be individual, follow the behavior in time, and be specific.     | Messages that tell the user how much he/she has already achieved and display of graph                                                         | Self-regulation,<br>Social<br>Cognitive<br>Theory   | [2-4]  |
|                   | Motivational messages/verbal persuasion about capacity               | Feedback | Feedback needs to be individual, follow the behavior in time, and be specific.     | Messages telling the user how well he/she is doing and to keep up the good work or telling the user some advantage of being physically active |                                                     | [2]    |
|                   | Modeling/ social comparison                                          | Modeling | Attention, remembrance, skills, reinforcement; credible source, method and channel | Messages stating how well others are doing and display of graph                                                                               | Social<br>cognitive<br>theory, Theory<br>of planned | [1, 2] |

|                                     |                                                 |                                                               |                                                                                                    |                                                                          |                                          |        |
|-------------------------------------|-------------------------------------------------|---------------------------------------------------------------|----------------------------------------------------------------------------------------------------|--------------------------------------------------------------------------|------------------------------------------|--------|
|                                     |                                                 |                                                               |                                                                                                    |                                                                          | behavior                                 |        |
|                                     | Provide instruction                             | Active learning                                               | Time, information and skills                                                                       | Messages that prompt the user to prepare the sports bag the night before | Social cognitive theory                  | [1, 2] |
|                                     | Prompt goal setting                             | Goal setting                                                  | Commitment to the goal; goals that are difficult but available within the individual's skill level | Messages prompting the user to set a goal and providing a suggestion     | Self-regulation, Social cognitive theory | [1, 2] |
| <b>Impediments</b>                  | Prompt barrier identification / Problem solving | Planning coping responses                                     | Identification of high-risk situations and practice of coping response.                            | Message that provides information on how to deal with a specific barrier | Social cognitive theory                  | [1, 2] |
| <b>Social norm (descriptive and</b> | Social comparisons                              | Graph tailored to preference social comparisons (up-/downward | Upward comparison may help setting better goals; downward comparison may help feeling more self-   | Messages that provide information on how to deal with a specific barrier | Social comparison theory                 | [1, 2] |

|                        |                                                                      |                                    |                                                                                                    |                                                                              |                                          |        |
|------------------------|----------------------------------------------------------------------|------------------------------------|----------------------------------------------------------------------------------------------------|------------------------------------------------------------------------------|------------------------------------------|--------|
| <b>inductive)</b>      |                                                                      |                                    | efficacious.                                                                                       |                                                                              |                                          |        |
|                        | Information about others' approval                                   | Information about others' approval | Positive expectations available in social environment                                              | Messages that provide information on how to deal with a specific barrier     | Social cognitive theory                  | [1, 2] |
| <b>Self-regulation</b> | Self-monitoring                                                      | Feedback                           | Feedback needs to be individual, follow the behavior in time, and be specific.                     | Messages that prompt to look at the monitoring graphs and display of graph   | Self-regulation, Social cognitive theory | [1, 2] |
|                        | Goal setting                                                         | Goal setting                       | Commitment to the goal; goals that are difficult but available within the individual's skill level | Messages that prompt the user to set a weekly goal                           | Control theory                           | [1, 2] |
|                        | Progress towards goal/ Discrepancy between current behavior and goal | Feedback                           | Feedback needs to be individual, follow the behavior in time, and be specific.                     | Messages that tell the user how much he/she has already achieved and display | Control theory                           | [1, 2] |

|  |                                                             |                                                 |                                                                                                                                                                                                                                                                   |                                                                                                                           |                                                                                         |        |
|--|-------------------------------------------------------------|-------------------------------------------------|-------------------------------------------------------------------------------------------------------------------------------------------------------------------------------------------------------------------------------------------------------------------|---------------------------------------------------------------------------------------------------------------------------|-----------------------------------------------------------------------------------------|--------|
|  |                                                             |                                                 |                                                                                                                                                                                                                                                                   | of graph                                                                                                                  |                                                                                         |        |
|  | Self-evaluation/<br>Monitoring<br>outcome(s) of<br>behavior | Self-reevaluation                               | Stimulation of both cognitive<br>and<br>affective appraisal of self-<br>image.<br><br>Can use feedback and<br>confrontation;<br><br>however, raising awareness<br>must be<br><br>quickly followed by increase in<br>problem-solving ability and<br>self-efficacy. | Messages prompting<br>the user to evaluate<br>how he/she is feeling<br>about failing or<br>achieving the self-set<br>goal | Control<br>theory,<br>Integrated<br>theory of<br>health<br>behavior<br>change           | [1, 2] |
|  | Imaginary reward                                            | Provide contingent<br>rewards/reinforce<br>ment | The reward needs to be<br>tailored to the individual, to<br>follow the behavior in time,<br>and to be seen as a<br>consequence of the behavior.                                                                                                                   | Messages that tell the<br>user to be proud if<br>they did well                                                            | Self-<br>regulation,<br>Social<br>cognitive<br>theory, Self-<br>determination<br>theory | [1, 2] |

|                            |                                                                             |                          |                                                                                                                                                                                                                                                                |                                                                                                                           |                                                                                   |           |
|----------------------------|-----------------------------------------------------------------------------|--------------------------|----------------------------------------------------------------------------------------------------------------------------------------------------------------------------------------------------------------------------------------------------------------|---------------------------------------------------------------------------------------------------------------------------|-----------------------------------------------------------------------------------|-----------|
| <b>Satisfaction</b>        | Self-evaluation/<br>Monitoring<br>outcome(s) of<br>behavior                 | Self-reevaluation        | Stimulation of both cognitive<br>and affective appraisal of self-<br>image.<br><br>Can use feedback and<br>confrontation;<br><br>however, raising awareness<br>must be<br><br>quickly followed by increase in<br>problem-solving ability and<br>self-efficacy. | Messages prompting<br>the user to evaluate<br>how he/she is feeling<br>about failing or<br>achieving the self-set<br>goal | Control<br>theory,<br><br>Integrated<br>theory of<br>health<br>behavior<br>change | [1, 2, 7] |
| <b>Long-term<br/>goals</b> | Provide general<br>information on<br>consequences of<br>behavior in general | Consciousness<br>raising | Can use feedback and<br>confrontation;<br><br>however, raising awareness<br>must be<br><br>quickly followed by increase in<br>problem-solving ability and<br>(collective) self-efficacy.                                                                       | Messages providing<br>general information<br>on consequences of<br>behavior in general                                    | Information-<br>motivation-<br>behavioral<br>skills model                         | [1, 2]    |

1. Abraham C, Michie S. A taxonomy of behavior change techniques used in interventions. *Health Psychol.* 2008 5/2008;27(3):379-87. doi: 2008-08834-010 [pii];10.1037/0278-6133.27.3.379 [doi].
2. Kok G, Gottlieb NH, Peters GJ, Mullen PD, Parcel GS, Ruiter RA, et al. A taxonomy of behaviour change methods: an Intervention Mapping approach. *Health Psychol Rev.* 2016 Sep;10(3):297-312. PMID: 26262912. doi: 10.1080/17437199.2015.1077155.
3. Williams SL, French DP. What are the most effective intervention techniques for changing physical activity self-efficacy and physical activity behaviour--and are they the same? *Health Educ Res.* 2011 4/2011;26(2):308-22. doi: cyr005 [pii];10.1093/her/cyr005.
4. Olander EK, Fletcher H, Williams S, Atkinson L, Turner A, French DP. What are the most effective techniques in changing obese individuals' physical activity self-efficacy and behaviour: a systematic review and meta-analysis. *Int J Behav Nutr Phys Act.* 2013 2013;10:29. doi: 1479-5868-10-29 [pii];10.1186/1479-5868-10-29.
5. Plotnikoff RC, Costigan SA, Karunamuni N, Lubans DR. Social cognitive theories used to explain physical activity behavior in adolescents: a systematic review and meta-analysis. *Prev Med.* 2013 May;56(5):245-53. PMID: 23370047. doi: 10.1016/j.ypmed.2013.01.013.
6. Sniehotta FF. Towards a theory of intentional behaviour change: plans, planning, and self-regulation. *Br J Health Psychol.* 2009 May;14(Pt 2):261-73. PMID: 19102817. doi: 10.1348/135910708X389042.
7. Abraham C, Michie S. Coding Manual to Identify Behaviour Change Techniques in Behaviour Change Intervention Descriptions. 2007 [updated 2007; cited 2013 1/7/2013]; Available from: <http://www.webcitation.org/6ITFkuVgk>.
