# Supplementary material for: App-Based Intervention Combining Evidence-Based Behavior Change Techniques With a Model-Based Reasoning System to Promote Physical Activity Among Young Adults (Active2Gether): Descriptive Study of the Development and Content
Source: PubMed Central journal article supplement (PMC6320419; doi:10.2196/resprot.7169), 2018-12-21
Supplement: resprot_v7i12e185_app3.pdf [file resprot_v7i12e185_app3.pdf]

| Behavior determinant                            | Example question long version                                                                                                                                                                                                                                                                                                                                 | Number of items long version | Question short version                                                                                                                                                                                                                                                                                                                                                                                                                                          | Answer possibilities                                                                                                                      |
|-------------------------------------------------|---------------------------------------------------------------------------------------------------------------------------------------------------------------------------------------------------------------------------------------------------------------------------------------------------------------------------------------------------------------|------------------------------|-----------------------------------------------------------------------------------------------------------------------------------------------------------------------------------------------------------------------------------------------------------------------------------------------------------------------------------------------------------------------------------------------------------------------------------------------------------------|-------------------------------------------------------------------------------------------------------------------------------------------|
| Outcome Expectations [NQLS <sup>1</sup> , [68]] | <p><b>If I participate in regular physical activity or sports, then:</b></p> <ul style="list-style-type: none"> <li>- I will improve my health</li> <li>- I will feel more attractive</li> <li>- I will lose weight</li> <li>- I will improve my physical fitness</li> <li>- I will feel relaxation</li> <li>- I will feel less tension and stress</li> </ul> | 6                            | <p>If I participate in regular <b>sports</b>, then it will have a positive effect, for example on my healthy, appearance, weight or how I will feel.</p> <p>If I regularly <b>take the stairs</b>, then it will have a positive effect, for example on my healthy, appearance, weight or how I will feel.</p> <p>If I regularly <b>bike or walk</b>, then it will have a positive effect, for example on my healthy, appearance, weight or how I will feel.</p> | <p>1 – No reason at all</p> <p>2 – A slightly important reason</p> <p>3 – A quite important reason</p> <p>4 – A very important reason</p> |

|                                                                                            |                                                                                                                                                                                                                                                                                                                                                                                               |    |                                                                                                                                                                                                                                                                                                                                                                                                                                           |                                                                                                                                                      |
|--------------------------------------------------------------------------------------------|-----------------------------------------------------------------------------------------------------------------------------------------------------------------------------------------------------------------------------------------------------------------------------------------------------------------------------------------------------------------------------------------------|----|-------------------------------------------------------------------------------------------------------------------------------------------------------------------------------------------------------------------------------------------------------------------------------------------------------------------------------------------------------------------------------------------------------------------------------------------|------------------------------------------------------------------------------------------------------------------------------------------------------|
|                                                                                            |                                                                                                                                                                                                                                                                                                                                                                                               |    |                                                                                                                                                                                                                                                                                                                                                                                                                                           |                                                                                                                                                      |
| Self-efficacy<br>[Self-efficacy<br>scales for<br>exercise [79],<br>NQLS <sup>1</sup> [68]] | <p><b>How confident are you that you could do PA, in each of the following situations? I'm confident that I could:</b></p> <ul style="list-style-type: none"> <li>- Do PA even when I'm tired</li> <li>- Do PA even when I'm in a bad mood</li> <li>- Do PA even when I feel I don't have time</li> <li>- Do PA even when I am on holiday</li> <li>- Do PA even when it is raining</li> </ul> | 12 | <p>How confident are you that you will do sports in the next week even when you're tired, busy or when it's bad weather?</p> <p>How confident are you that you will take the stairs in the next week even when you're tired, you're in a hurry or you're with others?</p> <p>How confident are you that you will cycle or walk to work/the university in the next week, even when you're tired, you're busy or when it's bad weather?</p> | <p>1 – Not at all confident</p> <p>2 – Slightly confident</p> <p>3 – Moderate Confident</p> <p>4 – Very Confident</p> <p>5 – Extremely confident</p> |

|                                                             |                                                                                                                                                                                                                                                                                                                                                                                                                                                                                                                                               |           |                                                                                                                                                                                                                                                             |                                                                                    |
|-------------------------------------------------------------|-----------------------------------------------------------------------------------------------------------------------------------------------------------------------------------------------------------------------------------------------------------------------------------------------------------------------------------------------------------------------------------------------------------------------------------------------------------------------------------------------------------------------------------------------|-----------|-------------------------------------------------------------------------------------------------------------------------------------------------------------------------------------------------------------------------------------------------------------|------------------------------------------------------------------------------------|
| <p>Perceived barriers for sport [NQLS<sup>1</sup> [68]]</p> | <p><b>How often do the following barriers prevent you from doing sports activities?</b></p> <ul style="list-style-type: none"> <li>- Bad weather</li> <li>- Lack of time</li> <li>- Lack of interest in exercise</li> <li>- Other priorities</li> <li>- Lack of skills or knowledge</li> <li>- Lack of equipment</li> <li>- Lack of facilities or space</li> <li>- Lack of physical fitness</li> <li>- Lack of energy</li> <li>- Lack of money</li> <li>- Lack of company</li> <li>- Self-conscious about my looks when I exercise</li> </ul> | <p>12</p> | <p>How often do barriers prevent you from participating in sports or exercise activities? Think for example of lack of time, lack of energy, costs, lack of company.</p>                                                                                    | <p>1 – Never<br/>2 – Rarely<br/>3 – Sometimes<br/>4 – Often<br/>5 – Very often</p> |
| <p>Perceived barriers for active transport</p>              | <p><b>How often do the following barriers prevent you from traveling by bike or by walking instead of traveling by car or public transport?</b></p> <ul style="list-style-type: none"> <li>- Bad weather</li> <li>- Lack of time</li> <li>- Lack of physical fitness</li> <li>- Lack of energy</li> <li>- Too many pieces of luggage</li> <li>- Travel distance is too far away</li> <li>- No suitable bike</li> </ul>                                                                                                                        | <p>7</p>  | <p>How often do barriers prevent you from <b>cycling or walking</b> to work /the university instead of traveling by public transport or car? Think for example of lack of time, lack of physical fitness, lack of energy or too many pieces of luggage.</p> | <p>1 – Never<br/>2 – Rarely<br/>3 – Sometimes<br/>4 – Often<br/>5 – Very often</p> |

|                                               |                                                                                                                                                                                                                                                                                                       |          |                                                                                                                                                                                                                                                                                                                                          |                                                                                                                              |
|-----------------------------------------------|-------------------------------------------------------------------------------------------------------------------------------------------------------------------------------------------------------------------------------------------------------------------------------------------------------|----------|------------------------------------------------------------------------------------------------------------------------------------------------------------------------------------------------------------------------------------------------------------------------------------------------------------------------------------------|------------------------------------------------------------------------------------------------------------------------------|
| <p>Perceived barriers for stairs climbing</p> | <p><b>How often do the following barriers from climbing the stairs?</b></p> <ul style="list-style-type: none"> <li>- Lack of physical fitness</li> <li>- Lack of energy</li> <li>- Too many pieces of luggage</li> <li>- Too many flights of stairs</li> </ul>                                        | <p>4</p> | <p>How often do barriers prevent you from climbing the stairs?</p> <p>For example barriers as being in a hurry, lack of physical fitness, lack of energy or carrying too many pieces of luggage?</p>                                                                                                                                     | <p>1 – Never<br/>2 – Rarely<br/>3 – Sometimes<br/>4 – Often<br/>5 – Very often</p>                                           |
| <p>Social norm descriptive</p>                | <ul style="list-style-type: none"> <li>- My friends think that I should be sufficient physically active.</li> <li>- My fellow students think that I should be sufficient physically active.</li> <li>- My brother(s) and/or sister(s) think that I should be sufficient physically active.</li> </ul> | <p>3</p> | <p>For the people around me (friends, fellow students, family), it's important that I sufficiently participate in sports.</p> <p>For the people around me (friends, fellow students, family), it's important that I use the stairs instead of the elevator.</p> <p>For the people around me (friends, fellow students, family), it's</p> | <p>1 – I strongly disagree<br/>2 – I somewhat disagree<br/>3 – Neutral<br/>4 – I somewhat agree<br/>5 – I strongly agree</p> |

|                        |                                                                                                                                |   |                                                                                                                                                                                                                           |                                                                                                                                 |
|------------------------|--------------------------------------------------------------------------------------------------------------------------------|---|---------------------------------------------------------------------------------------------------------------------------------------------------------------------------------------------------------------------------|---------------------------------------------------------------------------------------------------------------------------------|
|                        |                                                                                                                                |   | important that I regularly bike or walk to work/the university.                                                                                                                                                           |                                                                                                                                 |
| Social norm injunctive | - How often do your friends/roommates/brothers or sisters/parents participate in physical activities                           | 4 | Not applicable <sup>2</sup>                                                                                                                                                                                               | 1 – Never<br>2 – Rarely<br>3 – Sometimes<br>4 – Often<br>5 – Very often<br>6 – Not applicable                                   |
| Intention              | Do you intend do sports (more often) within the next week/month/6 months even if you think you're already sufficiently active? | 3 | I intend to do sports (more often) within the next week.<br><br>I intend to climb the stairs (more often) within the next week.<br><br>I intend to bike or walk to work/the university (more often) within the next week. | 1 – Most definitely will not<br>2 – Probably will not<br>3 – Maybe / maybe not<br>4 – Probably will<br>5 – Most definitely will |

|                                                                |                                                                                                                                                                                                                                                                                                                                                                                                                                                                                                                    |          |                                                                                                                                                                             |                                                                                    |
|----------------------------------------------------------------|--------------------------------------------------------------------------------------------------------------------------------------------------------------------------------------------------------------------------------------------------------------------------------------------------------------------------------------------------------------------------------------------------------------------------------------------------------------------------------------------------------------------|----------|-----------------------------------------------------------------------------------------------------------------------------------------------------------------------------|------------------------------------------------------------------------------------|
| <p>Self-regulation<br/>[12] [Anderson<br/>et al, 2006 [12]</p> | <p>I keep track of how active I am.</p> <p>I check whether I met my goals</p> <p>In the last three months I:</p> <ul style="list-style-type: none"> <li>- Set aside time for my daily physical activity</li> <li>- Walked or biked instead of drove or travelled by public transport</li> <li>- I exercised or did physical activities with someone else</li> <li>- I wrote it down in my calendar to do sports/physical activity</li> <li>- I planned do sports/exercise even when the weather was bad</li> </ul> | <p>7</p> | <p>I planned and set goals do regular sports/exercise.</p> <p>When I wasn't able do it I evaluated why I wasn't able to do it and whether I needed to change something.</p> | <p>1 – Never<br/>2 – Rarely<br/>3 – Sometimes<br/>4 – Often<br/>5 – Very often</p> |
| <p>Satisfaction</p>                                            | <p>How satisfied are you about how physically active you are?</p>                                                                                                                                                                                                                                                                                                                                                                                                                                                  | <p>1</p> | <p>How satisfied are you about how often you did sports in the last week?</p> <p>How satisfied are you about how often you</p>                                              | <p>0 – Very unhappy<br/>10 – Very happy</p>                                        |

|                 |                             |   |                                                                                                                                         |                                                        |
|-----------------|-----------------------------|---|-----------------------------------------------------------------------------------------------------------------------------------------|--------------------------------------------------------|
|                 |                             |   | <p>climbed the stairs last week?</p> <p>How satisfied are you about how often you biked or walked to work/the university last week?</p> |                                                        |
| Long-term goals | Not applicable <sup>3</sup> | 0 | How motivated are you to be more physically active?                                                                                     | <p>0 – Very unmotivated</p> <p>10 – Very motivated</p> |

<sup>1</sup> NQLS= Neighborhood Quality of Life Study

<sup>2</sup> Questions assessing social norm injunctive were not included in the short questionnaire.

<sup>3</sup> Long-term goals were not included in the long questionnaire
